# Supplementary material for: Solid-state organization of n-type carbazole-based semiconductors for organic thin-film transistors
Source: Royal Society of Chemistry journal article supplement (doi:10.1039/c7cp05135b), 2017-11-29
Supplement: c7cp05135b1.pdf [file c7cp05135b1.pdf]

## ELECTRONIC SUPPLEMENTARY INFORMATION

### Solid-state organization of n-type carbazole-based semiconductors for organic thin-film transistors

Marta Reig,<sup>a</sup> Joaquim Puigdollers<sup>b</sup> and Dolores Velasco<sup>\*a</sup>

<sup>a</sup> *Grup de Materials Orgànics, Institut de Nanociència i Nanotecnologia (IN<sup>2</sup>UB), Departament de Química Inorgànica i Orgànica, Secció de Química Orgànica, Universitat de Barcelona, Martí i Franquès 1, E-08028, Barcelona, Spain*

<sup>b</sup> *Dept. Enginyeria Electrònica, Universitat Politècnica de Catalunya, C/ Jordi Girona 1-3, E-08034, Barcelona, Spain*

<sup>\*</sup> *Corresponding author: D. Velasco. Phone: +34 93 403 92 60. Fax: +34 93 339 78 78. E-mail: dvelasco@ub.edu.*

#### Contents

|                                                                        |     |
|------------------------------------------------------------------------|-----|
| Crystallographic Data Collection and Refinement .....                  | S1  |
| <b>Table S1–S4</b> Crystallographic data of compounds <b>2–5</b> ..... | S3  |
| <b>Figure S1</b> TGA curves of compounds <b>2–5</b> .....              | S7  |
| <b>Figure S2</b> DSC curves of compounds <b>2–5</b> .....              | S8  |
| <b>Figure S3</b> Cyclic voltammograms of compounds <b>2–5</b> .....    | S9  |
| <b>Figure S4</b> Crystal structures of <b>1–5</b> .....                | S10 |
| <b>Figure S5–S9</b> OTFT characteristics of compounds <b>1–5</b> ..... | S11 |
| <b>Figure S10</b> Powder X-ray diffraction spectra of <b>1–5</b> ..... | S14 |

## Crystallographic Data Collection and Refinement

**Crystal structure of 2.** A red prism-like specimen of  $C_{19}H_{12}N_4$ , approximate dimensions 0.071 mm x 0.169 mm x 0.398 mm, was used for the X-ray crystallographic analysis. The X-ray intensity data were measured on a D8 Venture system equipped with a Multilayer monochromator and a Cu microfocus ( $\lambda = 1.54178 \text{ \AA}$ ). The frames were integrated with the Bruker SAINT software package using a narrow-frame algorithm. The integration of the data using a monoclinic unit cell yielded a total of 25035 reflections to a maximum  $\theta$  angle of  $74.68^\circ$  ( $0.80 \text{ \AA}$  resolution), of which 2930 were independent (average redundancy 8.544, completeness = 98.2%,  $R_{\text{int}} = 3.56\%$ ,  $R_{\text{sig}} = 1.84\%$ ) and 2623 (89.52%) were greater than  $2\sigma(F^2)$ . The final cell constants of  $a = 7.0914(2) \text{ \AA}$ ,  $b = 12.8955(4) \text{ \AA}$ ,  $c = 16.1234(6) \text{ \AA}$ ,  $\beta = 99.0270(10)^\circ$ , volume =  $1456.18(8) \text{ \AA}^3$ , are based upon the refinement of the XYZ-centroids of reflections above  $20 \sigma(I)$ . Data were corrected for absorption effects using the multi-scan method (SADABS). The calculated minimum and maximum transmission coefficients (based on crystal size) are 0.6903 and 0.7538. The structure was solved using the Bruker SHELXTL Software Package, and refined using SHELXL,<sup>1</sup> using the space group P 1 21/c 1, with  $Z = 4$  for the formula unit,  $C_{19}H_{12}N_4$ . The final anisotropic full-matrix least-squares refinement on  $F^2$  with 227 variables converged at  $R1 = 6.26\%$ , for the observed data and  $wR2 = 14.20\%$  for all data. The goodness-of-fit was 1.127. The largest peak in the final difference electron density synthesis was  $0.440 \text{ e}^-/\text{\AA}^3$  and the largest hole was  $-0.348 \text{ e}^-/\text{\AA}^3$  with an RMS deviation of  $0.050 \text{ e}^-/\text{\AA}^3$ . On the basis of the final model, the calculated density was  $1.352 \text{ g/cm}^3$  and  $F(000)$ , 616  $e^-$ . Further details concerning the resolution and refinement of the crystal structure are presented in Table S1.

**Crystal structure of 3.** A red prism-like specimen of  $C_{21}H_{16}N_4$ , approximate dimensions 0.049 mm x 0.128 mm x 0.256 mm, was used for the X-ray crystallographic analysis. The X-ray intensity data were measured on a D8 Venture system equipped with a multilayer monochromator and a Mo microfocus ( $\lambda = 0.71073 \text{ \AA}$ ). The frames were integrated with the Bruker SAINT software package using a narrow-frame algorithm. The integration of the data using a monoclinic unit cell yielded a total of 22892 reflections to a maximum  $\theta$  angle of  $27.51^\circ$  ( $0.77 \text{ \AA}$  resolution), of which 3749 were independent (average redundancy 6.106, completeness = 99.6%,  $R_{\text{int}} = 14.97\%$ ,  $R_{\text{sig}} = 9.48\%$ ) and 2127 (56.74%) were greater than  $2\sigma(F^2)$ . The final cell constants of  $a = 8.7842(7) \text{ \AA}$ ,  $b = 24.486(2) \text{ \AA}$ ,  $c = 8.1096(8) \text{ \AA}$ ,  $\beta = 110.652(3)^\circ$ , volume =  $1632.2(3) \text{ \AA}^3$ , are based upon the refinement of the XYZ-centroids of reflections above  $20 \sigma(I)$ . Data were corrected for absorption effects using the multi-scan method (SADABS). The calculated minimum and maximum transmission coefficients (based on crystal size) are 0.6796 and 0.7456. The structure was solved using the Bruker SHELXTL Software Package, and refined using SHELXL,<sup>1</sup> using the space group P 1 21/c 1, with  $Z = 4$  for the formula unit,  $C_{21}H_{16}N_4$ . The final anisotropic full-matrix least-squares refinement on  $F^2$  with 227 variables converged at  $R1 = 5.65\%$ , for the observed data and  $wR2 = 14.92\%$  for all data. The goodness-of-fit was 1.025. The largest peak in the final difference electron density synthesis was  $0.268 \text{ e}^-/\text{\AA}^3$  and the largest hole was  $-0.292 \text{ e}^-/\text{\AA}^3$  with an RMS deviation of  $0.066 \text{ e}^-/\text{\AA}^3$ . On the basis of the final model, the calculated density was  $1.320 \text{ g/cm}^3$  and  $F(000)$ , 680  $e^-$ . Further details concerning the resolution and refinement of the crystal structure are presented in Table S2.

<sup>1</sup> G. M. Sheldrick, *Acta Crystallogr.*, 2008, **A64**, 112.

**Crystal structure of 4.** A red prism-like specimen of  $C_{25}H_{24}N_4$ , approximate dimensions 0.042 mm x 0.082 mm x 0.141 mm, was used for the X-ray crystallographic analysis. The X-ray intensity data were measured on a D8 Venture system equipped with a multilayer monochromator and a Mo microfocus ( $\lambda = 0.71073 \text{ \AA}$ ). The frames were integrated with the Bruker SAINT software package using a narrow-frame algorithm. The integration of the data using a triclinic unit cell yielded a total of 25848 reflections to a maximum  $\theta$  angle of  $27.72^\circ$  ( $0.76 \text{ \AA}$  resolution), of which 5019 were independent (average redundancy 5.150, completeness = 98.0%,  $R_{\text{int}} = 9.69\%$ ,  $R_{\text{sig}} = 5.71\%$ ) and 1658 (33.03%) were greater than  $2\sigma(F^2)$ . The final cell constants of  $a = 7.917(3) \text{ \AA}$ ,  $b = 8.777(4) \text{ \AA}$ ,  $c = 16.892(7) \text{ \AA}$ ,  $\alpha = 92.79(2)^\circ$ ,  $\beta = 102.20(2)^\circ$ ,  $\gamma = 107.30(2)^\circ$ , volume =  $1087.5(8) \text{ \AA}^3$ , are based upon the refinement of the XYZ-centroids of reflections above  $20 \sigma(I)$ . Data were corrected for absorption effects using the multi-scan method (SADABS). The calculated minimum and maximum transmission coefficients (based on crystal size) are 0.6046 and 0.7456. The structure was solved and refined using the Bruker SHELXTL Software Package, using the space group  $P -1$ , with  $Z = 2$  for the formula unit,  $C_{25}H_{24}N_4$ . The final anisotropic full-matrix least-squares refinement on  $F^2$  with 263 variables converged at  $R1 = 8.27\%$ , for the observed data and  $wR2 = 29.55\%$  for all data. The goodness-of-fit was 0.991. The largest peak in the final difference electron density synthesis was  $0.441 \text{ e}^-/\text{\AA}^3$  and the largest hole was  $-0.337 \text{ e}^-/\text{\AA}^3$  with an RMS deviation of  $0.047 \text{ e}^-/\text{\AA}^3$ . On the basis of the final model, the calculated density was  $1.162 \text{ g/cm}^3$  and  $F(000)$ , 404 e<sup>-</sup>. Further details concerning the resolution and refinement of the crystal structure are presented in Table S3.

**Crystal structure of 5.** A red prism-like specimen of  $C_{29}H_{32}N_4$ , approximate dimensions 0.048 mm x 0.120 mm x 0.260 mm, was used for the X-ray crystallographic analysis. The X-ray intensity data were measured on a D8 Venture system equipped with a multilayer monochromator and a Mo microfocus ( $\lambda = 0.71073 \text{ \AA}$ ). The frames were integrated with the Bruker SAINT software package using a narrow-frame algorithm. The integration of the data using a triclinic unit cell yielded a total of 27439 reflections to a maximum  $\theta$  angle of  $26.75^\circ$  ( $0.79 \text{ \AA}$  resolution), of which 5387 were independent (average redundancy 5.094, completeness = 98.0%,  $R_{\text{int}} = 6.24\%$ ,  $R_{\text{sig}} = 4.22\%$ ) and 2328 (43.22%) were greater than  $2\sigma(F^2)$ . The final cell constants of  $a = 7.7023(13) \text{ \AA}$ ,  $b = 8.9110(15) \text{ \AA}$ ,  $c = 20.022(4) \text{ \AA}$ ,  $\alpha = 77.669(9)^\circ$ ,  $\beta = 84.775(8)^\circ$ ,  $\gamma = 73.953(7)^\circ$ , volume =  $1289.4(4) \text{ \AA}^3$ , are based upon the refinement of the XYZ-centroids of reflections above  $20 \sigma(I)$ . Data were corrected for absorption effects using the multi-scan method (SADABS). The calculated minimum and maximum transmission coefficients (based on crystal size) are 0.6140 and 0.7454. The structure was solved and refined using the Bruker SHELXTL Software Package, using the space group  $P -1$ , with  $Z = 2$  for the formula unit,  $C_{29}H_{32}N_4$ . The final anisotropic full-matrix least-squares refinement on  $F^2$  with 299 variables converged at  $R1 = 6.44\%$ , for the observed data and  $wR2 = 18.12\%$  for all data. The goodness-of-fit was 1.020. The largest peak in the final difference electron density synthesis was  $0.202 \text{ e}^-/\text{\AA}^3$  and the largest hole was  $-0.144 \text{ e}^-/\text{\AA}^3$  with an RMS deviation of  $0.029 \text{ e}^-/\text{\AA}^3$ . On the basis of the final model, the calculated density was  $1.124 \text{ g/cm}^3$  and  $F(000)$ , 468 e<sup>-</sup>. Further details concerning the resolution and refinement of the crystal structure are presented in Table S4.

**Table S1** Crystal data and structure refinement for 9-ethyl-3-(1,2,2)-tricyanovinyl-9*H*-carbazole (**2**).

|                                   |                                                       |                   |
|-----------------------------------|-------------------------------------------------------|-------------------|
| Identification code               | 9-ethyl-3-(1,2,2)-tricyanovinyl-9 <i>H</i> -carbazole |                   |
| Empirical formula                 | C <sub>19</sub> H <sub>12</sub> N <sub>4</sub>        |                   |
| Formula weight                    | 296.33                                                |                   |
| Temperature                       | 100(2) K                                              |                   |
| Wavelength                        | 1.54178 Å                                             |                   |
| Crystal system                    | Monoclinic                                            |                   |
| Space group                       | P 2 <sub>1</sub> /c                                   |                   |
| Unit cell dimensions              | a = 7.0914(2) Å                                       | α = 90°.          |
|                                   | b = 12.8955(4) Å                                      | β = 99.0270(10)°. |
|                                   | c = 16.1234(6) Å                                      | γ = 90°.          |
| Volume                            | 1456.18(8) Å <sup>3</sup>                             |                   |
| Z                                 | 4                                                     |                   |
| Density (calculated)              | 1.352 Mg/m <sup>3</sup>                               |                   |
| Absorption coefficient            | 0.661 mm <sup>-1</sup>                                |                   |
| F(000)                            | 616                                                   |                   |
| Crystal size                      | 0.398 x 0.169 x 0.071 mm <sup>3</sup>                 |                   |
| Theta range for data collection   | 4.412 to 74.680°.                                     |                   |
| Index ranges                      | -8 ≤ h ≤ 7, -16 ≤ k ≤ 16, -20 ≤ l ≤ 20                |                   |
| Reflections collected             | 25035                                                 |                   |
| Independent reflections           | 2930 [R(int) = 0.0356]                                |                   |
| Completeness to theta = 67.679°   | 98.1 %                                                |                   |
| Absorption correction             | Semi-empirical from equivalents                       |                   |
| Max. and min. transmission        | 0.7538 and 0.6903                                     |                   |
| Refinement method                 | Full-matrix least-squares on F <sup>2</sup>           |                   |
| Data / restraints / parameters    | 2930 / 5 / 227                                        |                   |
| Goodness-of-fit on F <sup>2</sup> | 1.127                                                 |                   |
| Final R indices [I > 2σ(I)]       | R <sub>1</sub> = 0.0626, wR <sub>2</sub> = 0.1362     |                   |
| R indices (all data)              | R <sub>1</sub> = 0.0696, wR <sub>2</sub> = 0.1420     |                   |
| Extinction coefficient            | n/a                                                   |                   |
| Largest diff. peak and hole       | 0.440 and -0.348 e.Å <sup>-3</sup>                    |                   |

**Table S2** Crystal data and structure refinement for 9-butyl-3-(1,2,2)-tricyanovinyl-9*H*-carbazole (**3**).

|                                   |                                                       |                  |
|-----------------------------------|-------------------------------------------------------|------------------|
| Identification code               | 9-butyl-3-(1,2,2)-tricyanovinyl-9 <i>H</i> -carbazole |                  |
| Empirical formula                 | C <sub>21</sub> H <sub>16</sub> N <sub>4</sub>        |                  |
| Formula weight                    | 324.38                                                |                  |
| Temperature                       | 100(2) K                                              |                  |
| Wavelength                        | 0.71073 Å                                             |                  |
| Crystal system                    | Monoclinic                                            |                  |
| Space group                       | P 21/c                                                |                  |
| Unit cell dimensions              | a = 8.7842(7) Å                                       | α = 90°.         |
|                                   | b = 24.486(2) Å                                       | β = 110.652(3)°. |
|                                   | c = 8.1096(8) Å                                       | γ = 90°.         |
| Volume                            | 1632.2(3) Å <sup>3</sup>                              |                  |
| Z                                 | 4                                                     |                  |
| Density (calculated)              | 1.320 Mg/m <sup>3</sup>                               |                  |
| Absorption coefficient            | 0.081 mm <sup>-1</sup>                                |                  |
| F(000)                            | 680                                                   |                  |
| Crystal size                      | 0.256 x 0.128 x 0.049 mm <sup>3</sup>                 |                  |
| Theta range for data collection   | 2.478 to 27.506°.                                     |                  |
| Index ranges                      | -10 ≤ h ≤ 11, -31 ≤ k ≤ 31, -10 ≤ l ≤ 10              |                  |
| Reflections collected             | 22892                                                 |                  |
| Independent reflections           | 3749 [R(int) = 0.1497]                                |                  |
| Completeness to theta = 25.242°   | 99.9 %                                                |                  |
| Absorption correction             | Semi-empirical from equivalents                       |                  |
| Max. and min. transmission        | 0.7456 and 0.6796                                     |                  |
| Refinement method                 | Full-matrix least-squares on F <sup>2</sup>           |                  |
| Data / restraints / parameters    | 3749 / 0 / 227                                        |                  |
| Goodness-of-fit on F <sup>2</sup> | 1.025                                                 |                  |
| Final R indices [I > 2σ(I)]       | R <sub>1</sub> = 0.0565, wR <sub>2</sub> = 0.1194     |                  |
| R indices (all data)              | R <sub>1</sub> = 0.1300, wR <sub>2</sub> = 0.1492     |                  |
| Extinction coefficient            | n/a                                                   |                  |
| Largest diff. peak and hole       | 0.268 and -0.292 e.Å <sup>-3</sup>                    |                  |

**Table S3** Crystal data and structure refinement for 9-octyl-3-(1,2,2)-tricyanovinyl-9H-carbazole (**4**).

|                                   |                                                               |                 |
|-----------------------------------|---------------------------------------------------------------|-----------------|
| Identification code               | 9-octyl-3-(1,2,2)-tricyanovinyl-9H-carbazole                  |                 |
| Empirical formula                 | C <sub>25</sub> H <sub>24</sub> N <sub>4</sub>                |                 |
| Formula weight                    | 380.48                                                        |                 |
| Temperature                       | 293(2) K                                                      |                 |
| Wavelength                        | 0.71073 Å                                                     |                 |
| Crystal system                    | Triclinic                                                     |                 |
| Space group                       | P -1                                                          |                 |
| Unit cell dimensions              | a = 7.917(3) Å                                                | α = 92.79(2)°.  |
|                                   | b = 8.777(4) Å                                                | β = 102.20(2)°. |
|                                   | c = 16.892(7) Å                                               | γ = 107.30(2)°. |
| Volume                            | 1087.5(8) Å <sup>3</sup>                                      |                 |
| Z                                 | 2                                                             |                 |
| Density (calculated)              | 1.162 Mg/m <sup>3</sup>                                       |                 |
| Absorption coefficient            | 0.070 mm <sup>-1</sup>                                        |                 |
| F(000)                            | 404                                                           |                 |
| Crystal size                      | 0.141 x 0.082 x 0.042 mm <sup>3</sup>                         |                 |
| Theta range for data collection   | 2.448 to 27.715°.                                             |                 |
| Index ranges                      | -10<= <i>h</i> <=10, -11<= <i>k</i> <=11, -22<= <i>l</i> <=22 |                 |
| Reflections collected             | 25848                                                         |                 |
| Independent reflections           | 5019 [R(int) = 0.0969]                                        |                 |
| Completeness to theta = 25.242°   | 99.9 %                                                        |                 |
| Absorption correction             | Semi-empirical from equivalents                               |                 |
| Max. and min. transmission        | 0.7456 and 0.6046                                             |                 |
| Refinement method                 | Full-matrix least-squares on F <sup>2</sup>                   |                 |
| Data / restraints / parameters    | 5019 / 5 / 263                                                |                 |
| Goodness-of-fit on F <sup>2</sup> | 0.991                                                         |                 |
| Final R indices [I>2sigma(I)]     | R1 = 0.0827, wR2 = 0.2271                                     |                 |
| R indices (all data)              | R1 = 0.2608, wR2 = 0.2955                                     |                 |
| Extinction coefficient            | n/a                                                           |                 |
| Largest diff. peak and hole       | 0.441 and -0.337 e.Å <sup>-3</sup>                            |                 |

**Table S4** Crystal data and structure refinement for 9-dodecyl-3-(1,2,2)-tricyanovinyl-9*H*-carbazole (**5**).

|                                   |                                                         |                 |
|-----------------------------------|---------------------------------------------------------|-----------------|
| Identification code               | 9-dodecyl-3-(1,2,2)-tricyanovinyl-9 <i>H</i> -carbazole |                 |
| Empirical formula                 | C <sub>29</sub> H <sub>32</sub> N <sub>4</sub>          |                 |
| Formula weight                    | 436.58                                                  |                 |
| Temperature                       | 298(2) K                                                |                 |
| Wavelength                        | 0.71073 Å                                               |                 |
| Crystal system                    | Triclinic                                               |                 |
| Space group                       | P -1                                                    |                 |
| Unit cell dimensions              | a = 7.7023(13) Å                                        | α = 77.669(9)°. |
|                                   | b = 8.9110(15) Å                                        | β = 84.775(8)°. |
|                                   | c = 20.022(4) Å                                         | γ = 73.953(7)°. |
| Volume                            | 1289.5(4) Å <sup>3</sup>                                |                 |
| Z                                 | 2                                                       |                 |
| Density (calculated)              | 1.124 Mg/m <sup>3</sup>                                 |                 |
| Absorption coefficient            | 0.067 mm <sup>-1</sup>                                  |                 |
| F(000)                            | 468                                                     |                 |
| Crystal size                      | 0.260 x 0.120 x 0.048 mm <sup>3</sup>                   |                 |
| Theta range for data collection   | 2.426 to 26.748°.                                       |                 |
| Index ranges                      | -9 ≤ h ≤ 9, -11 ≤ k ≤ 11, -25 ≤ l ≤ 25                  |                 |
| Reflections collected             | 27439                                                   |                 |
| Independent reflections           | 5387 [R(int) = 0.0624]                                  |                 |
| Completeness to theta = 25.242°   | 99.7 %                                                  |                 |
| Absorption correction             | Semi-empirical from equivalents                         |                 |
| Max. and min. transmission        | 0.7454 and 0.6140                                       |                 |
| Refinement method                 | Full-matrix least-squares on F <sup>2</sup>             |                 |
| Data / restraints / parameters    | 5387 / 0 / 299                                          |                 |
| Goodness-of-fit on F <sup>2</sup> | 1.020                                                   |                 |
| Final R indices [I > 2σ(I)]       | R1 = 0.0644, wR2 = 0.1438                               |                 |
| R indices (all data)              | R1 = 0.1773, wR2 = 0.1812                               |                 |
| Absorption correction             | multi-scan                                              |                 |
| Max. and min. transmission        | 0.7454 and 0.6140                                       |                 |
| Largest diff. peak and hole       | 0.202 and -0.144 e.Å <sup>-3</sup>                      |                 |

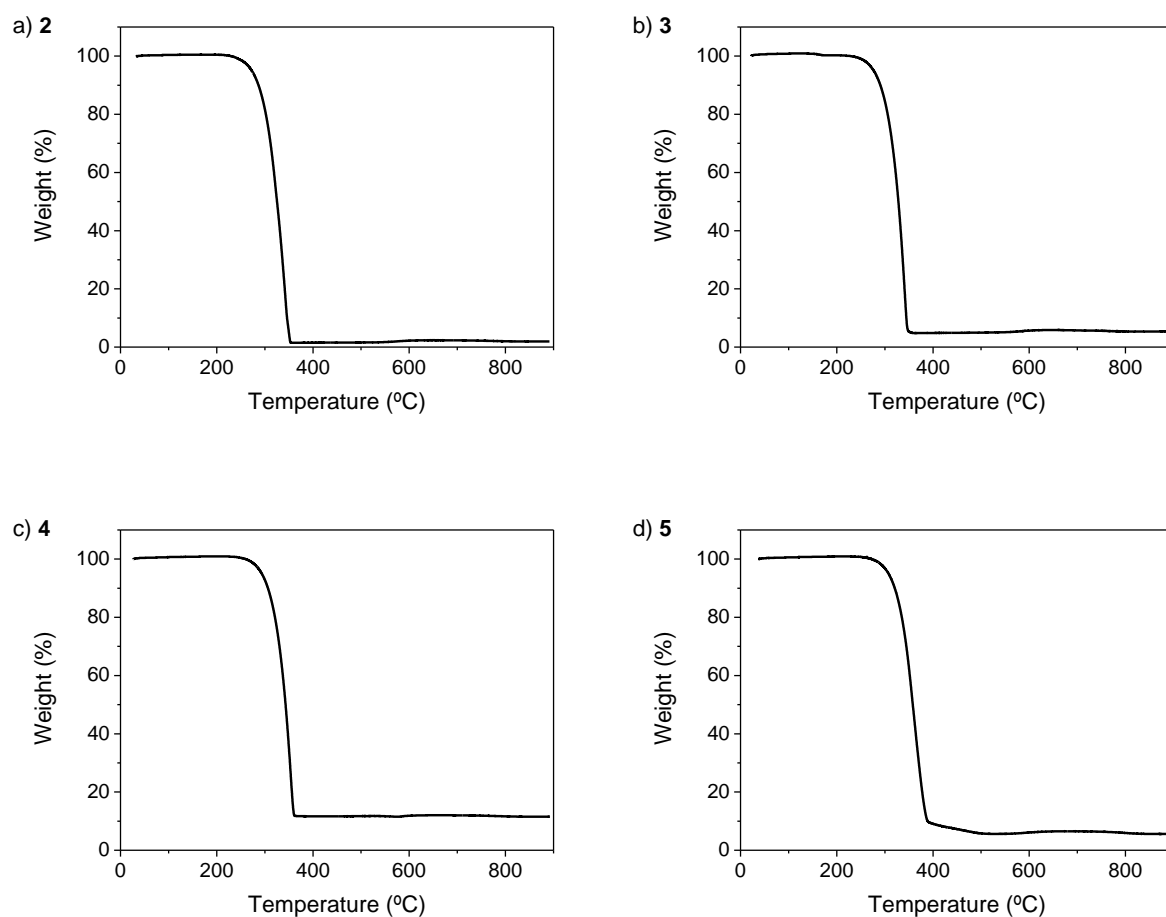

**Figure S1.** TGA curves of compounds **2–5** recorded at a scan rate of 20 °C min<sup>-1</sup> under a nitrogen atmosphere.



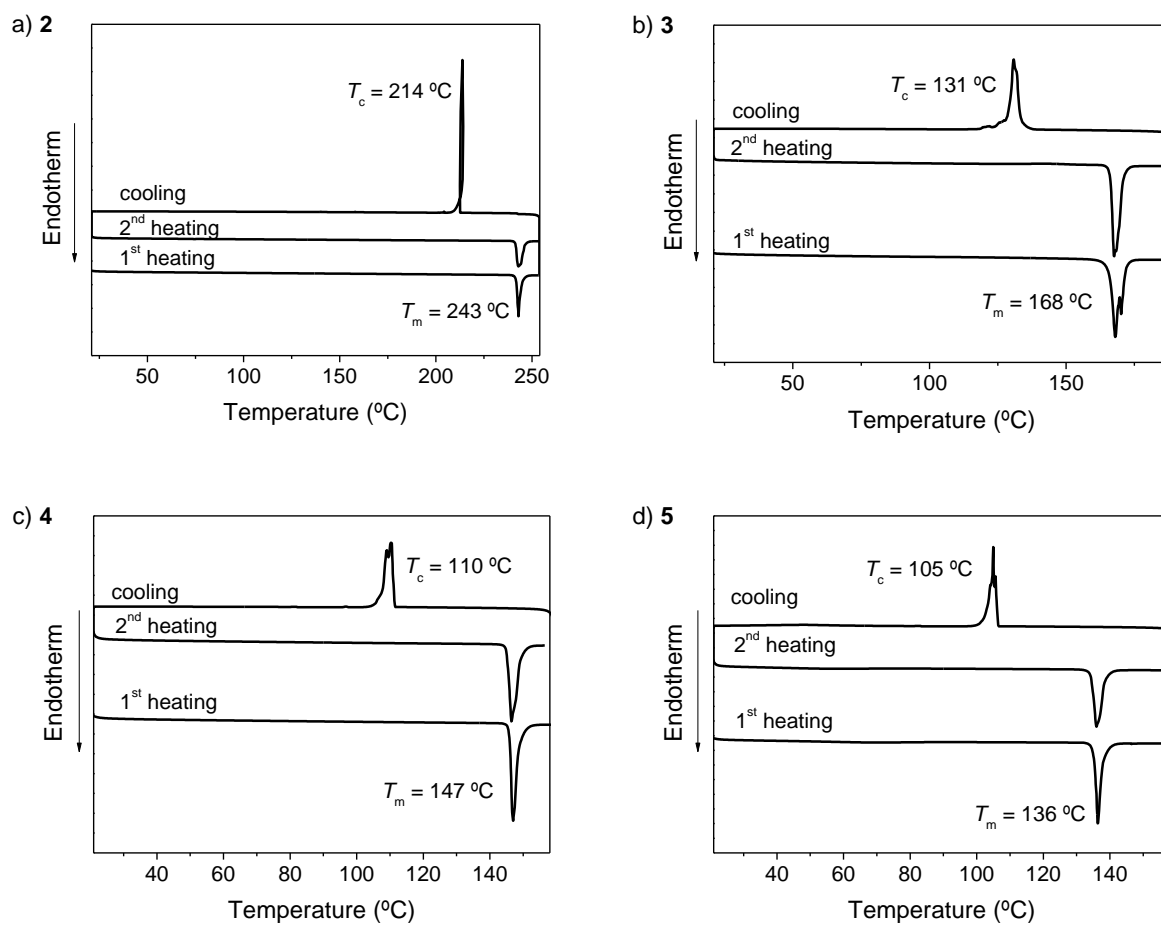

**Figure S2.** DSC curves of compounds **2–5** recorded at a scan rate of  $10\text{ °C min}^{-1}$  under a nitrogen atmosphere.

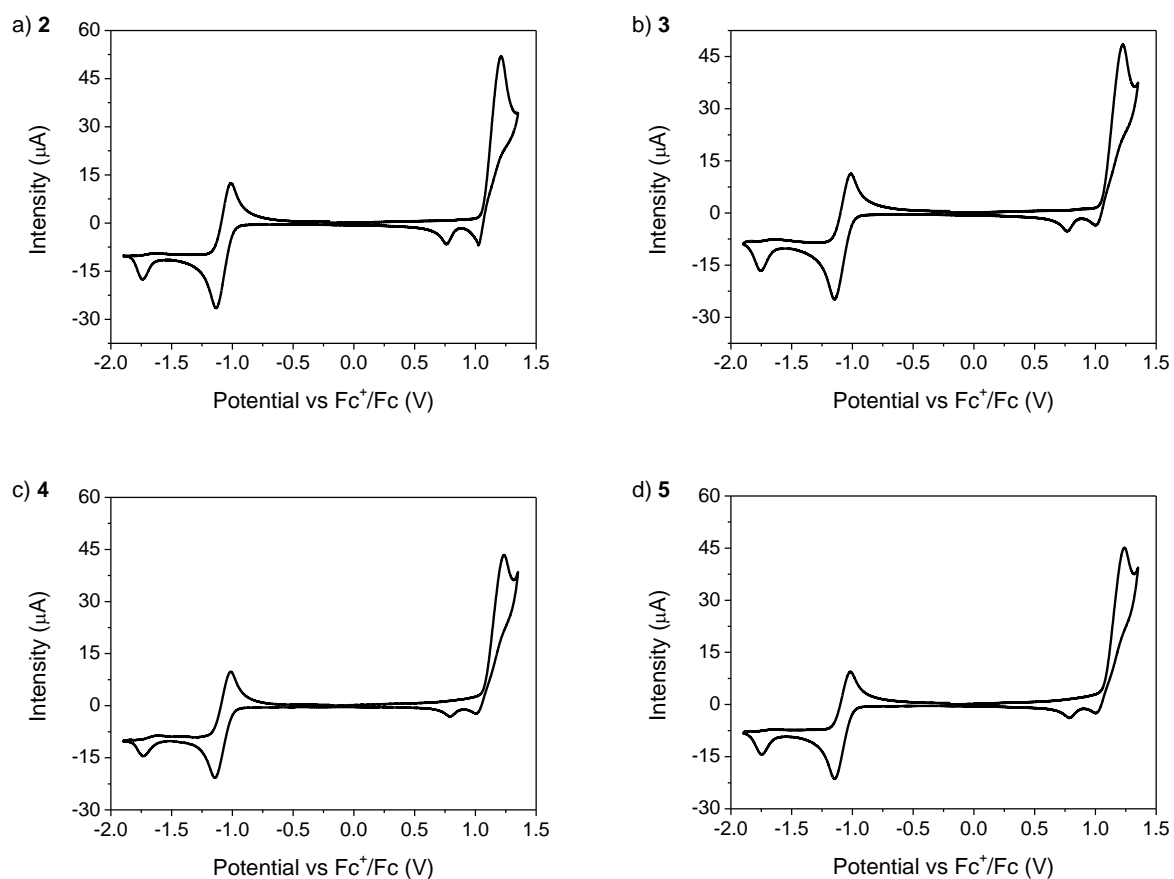

**Figure S3.** Cyclic voltammograms of compounds **2–5** recorded at  $100 \text{ mV s}^{-1}$  in argon-purged dichloromethane solutions (1 mM).

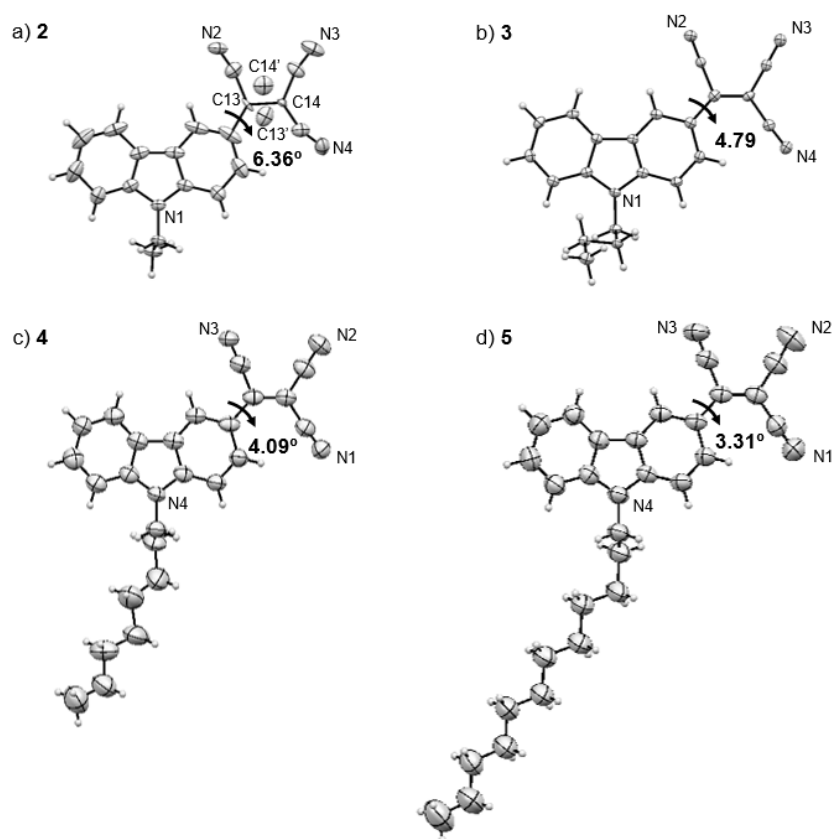

**Figure S4.** X-ray crystal structures of molecules **2–5**, showing the 50% probability displacement.

Regarding the crystal structure of *N*-ethyl derivative **2**, the tricyanovinyl group is presented in two different conformations, showing a free rotational barrier under the crystallization conditions.

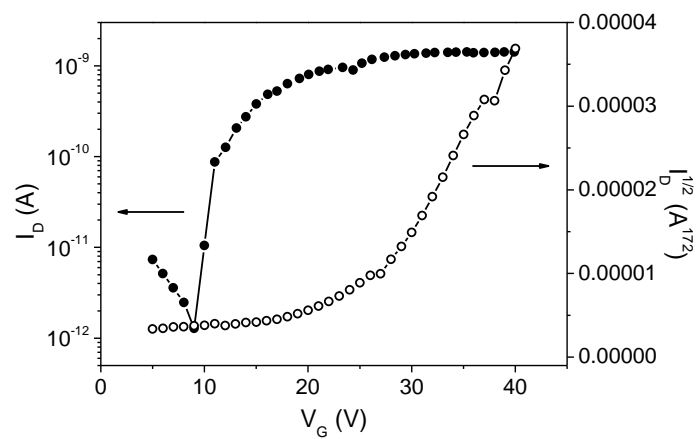

**Figure S5.** Transfer ( $V_D = 40$  V) and saturation characteristics of an OTFT device fabricated with **1** as the semiconductor layer on OTS-treated c-Si/SiO<sub>2</sub> substrate.

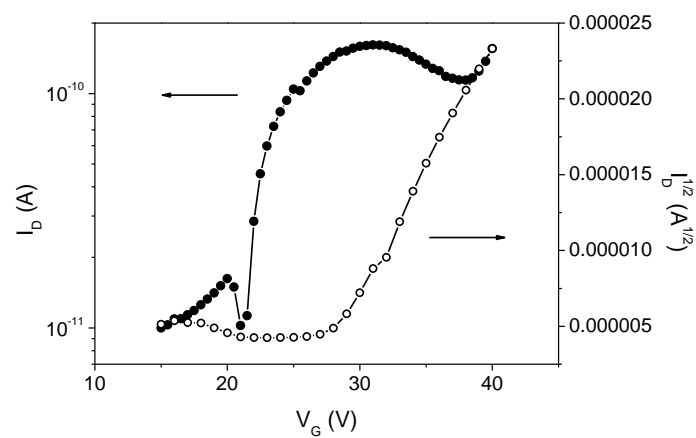

**Figure S6.** Transfer ( $V_D = 10$  V) and saturation characteristics of an OTFT device fabricated with **2** as the semiconductor layer and with PS-treated c-Si/SiO<sub>2</sub> substrate.

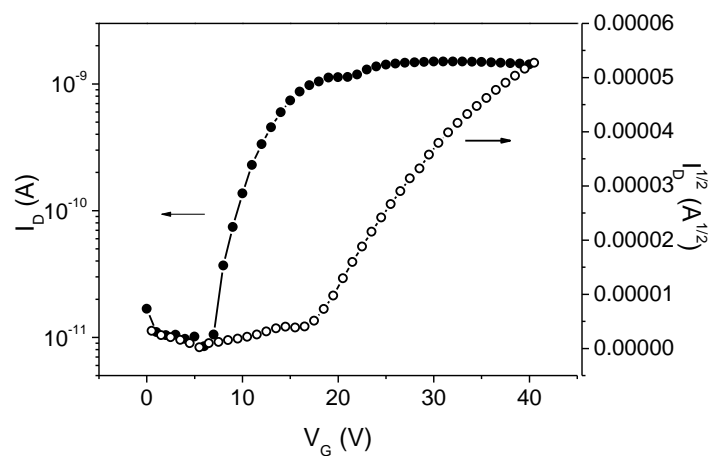

**Figure S7.** Transfer ( $V_D = 10$  V) and saturation characteristics of an OTFT device fabricated with **3** as the semiconductor layer on PS-treated c-Si/SiO<sub>2</sub> substrate.

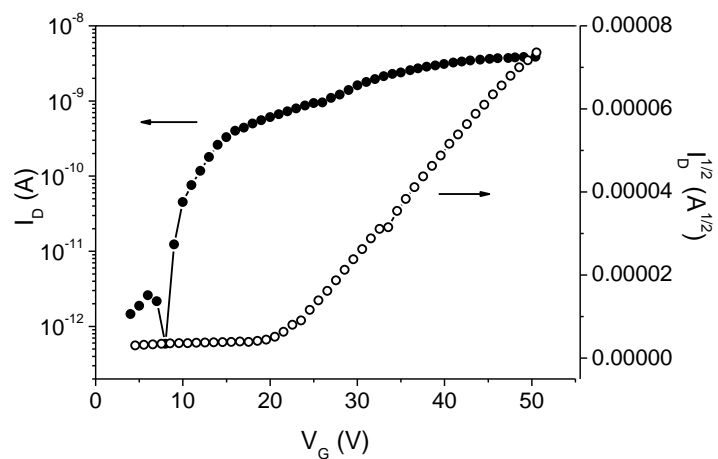

**Figure S8.** Transfer ( $V_D = 10$  V) and saturation characteristics of an OTFT device fabricated with **4** as the semiconductor layer and with PS-treated c-Si/SiO<sub>2</sub> substrate.

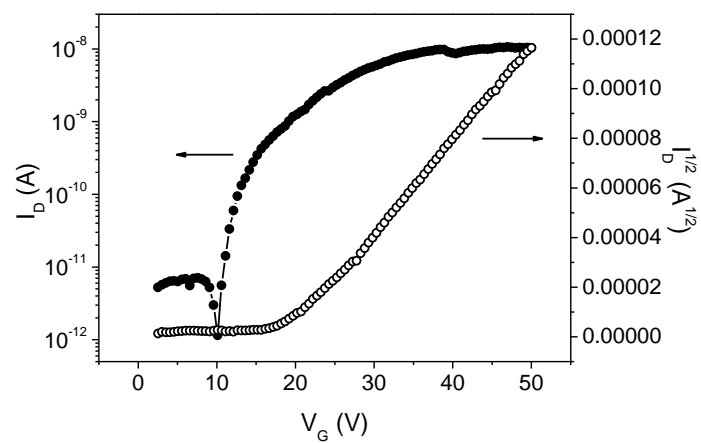

**Figure S9.** Transfer ( $V_D = 10$  V) and saturation characteristics of an OTFT device fabricated with **5** as the semiconductor layer and with PS-treated c-Si/SiO<sub>2</sub> substrate.

a) **1**

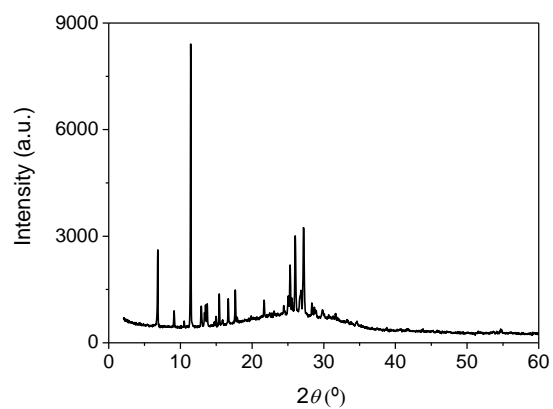

b) **2**

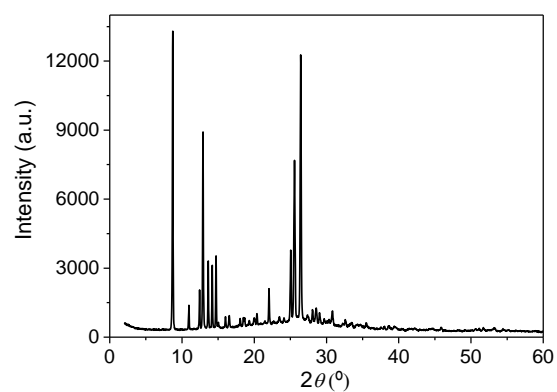

c) **3**

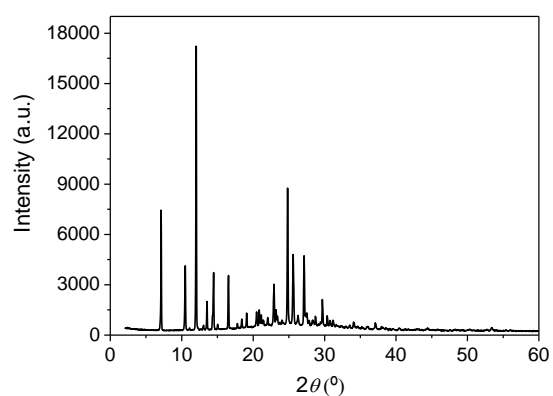

d) **4**

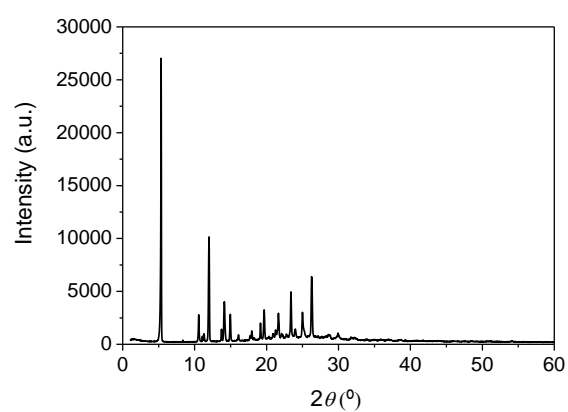

e) **5**

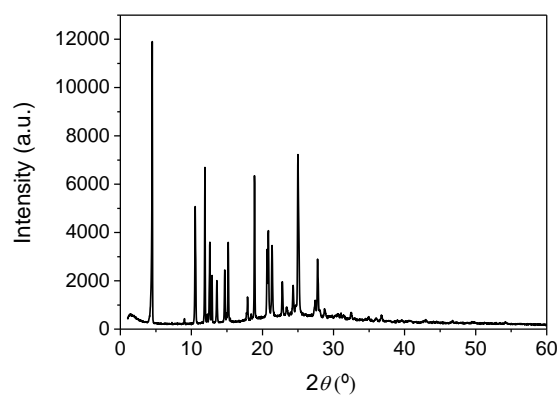

**Figure S10.** Powder XRD patterns of compounds **1–5**.
